# Supplementary material
Source: Research Square preprint supplement (doi:10.21203/rs.3.rs-9758197/v1)
Supplement: Supplementary file 1 [file b7b3035907ee2282f7ff7b1a.docx]

**SUPPLEMENTAL MATERIALS**

**Development of a G-Quadruplex-Forming DNA Aptamer Against EGFR-Driven Malignancies**

Deepa Singh1, Vikas Kumar1, Akash Kumar2, Tushar Kushwaha1, Kamal Baswal1, Rajkumar Kulandaisamy1, Manoj Kumar1, Saroj Kumar1, Prabhat Singh Malik3, Tailor Prafullakumar4, Deepak Seghal2, Tarun Kumar Sharma5, Mohan Babu Appaiahgari6*, Krishna K. Inampudi1*

1 Department of Biophysics, All India Institute of Medical Sciences, New Delhi, Delhi 110029, India

2 Virology Lab, Department of Life Sciences, Shiv Nadar University, Greater Noida, Uttar Pradesh 201314, India

3 Department of Medical Oncology, All India Institute of Medical Sciences, New Delhi 110029, India

4 Laboratory of Innate Immunity, National Institute of Immunology, New Delhi, India

5 Department of Medical Devices National Institute of Pharmaceutical Education and Research (NIPER), Mohali, Punjab 160062, India

6 Laboratory for Multidisciplinary Research in Virology, Yenepoya (deemed to be) University, Deralakatte, Mangaluru - 575018, Karnataka, India

***Corresponding Authors:**

**Dr. Krishna K Inampudi**

Additional Professor

Department of Biophysics

All India Institute of Medical Sciences (AIIMS),

Ansari Nagar, New Delhi-110 029, India

Telephone: +91-11-2659 3834

Email id: krishna.inampudi@aiims.edu, kishorehcu@gmail.com

**Dr. Mohan B Appaiahgari**

Associate Professor,

Laboratory for Multidisciplinary Research in Virology,

Yenepoya (deemed to be) University,

Deralakatte, Mangaluru - 575018, Karnataka, India

Email: mohanviro@gmail.com, mohan.ba@yenepoya.edu.in

**Supplemental Table 1.** DNA Aptamer Library and Primers.


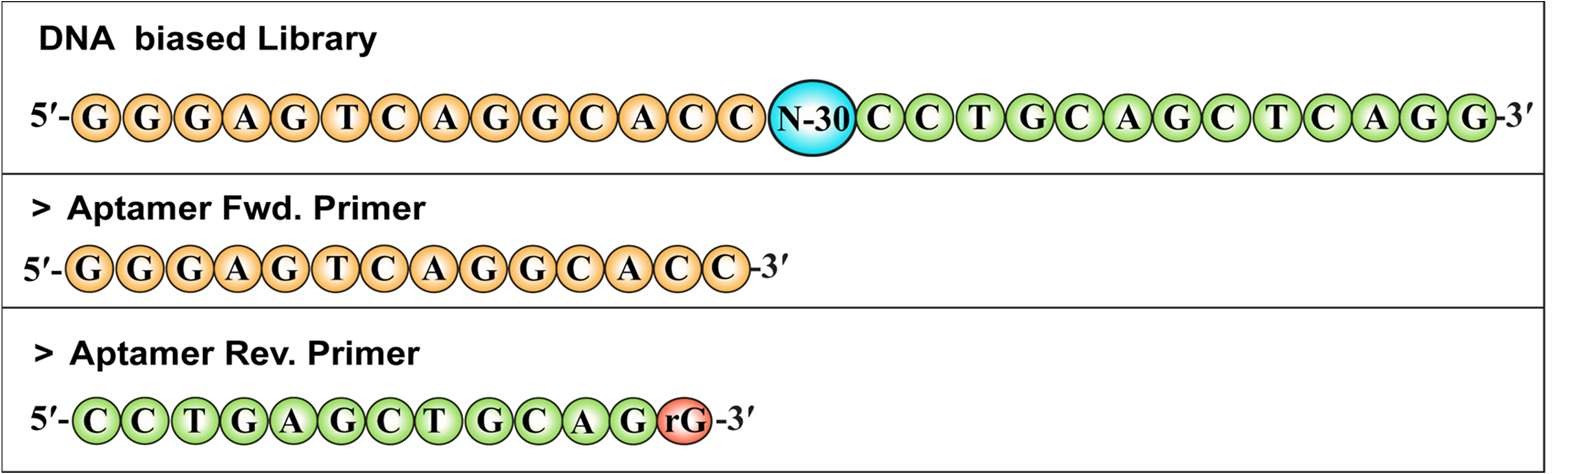


**Supplemental Table 2.** Next-generation sequencing (NGS) results

| 1. | Total Sequences | 25170392 |
| --- | --- | --- |
| 2. | Unique Sequences | 22327197 |
| 3. | Correct sequences (30nt) | 19388565 |

#

# **Supplemental Figures**


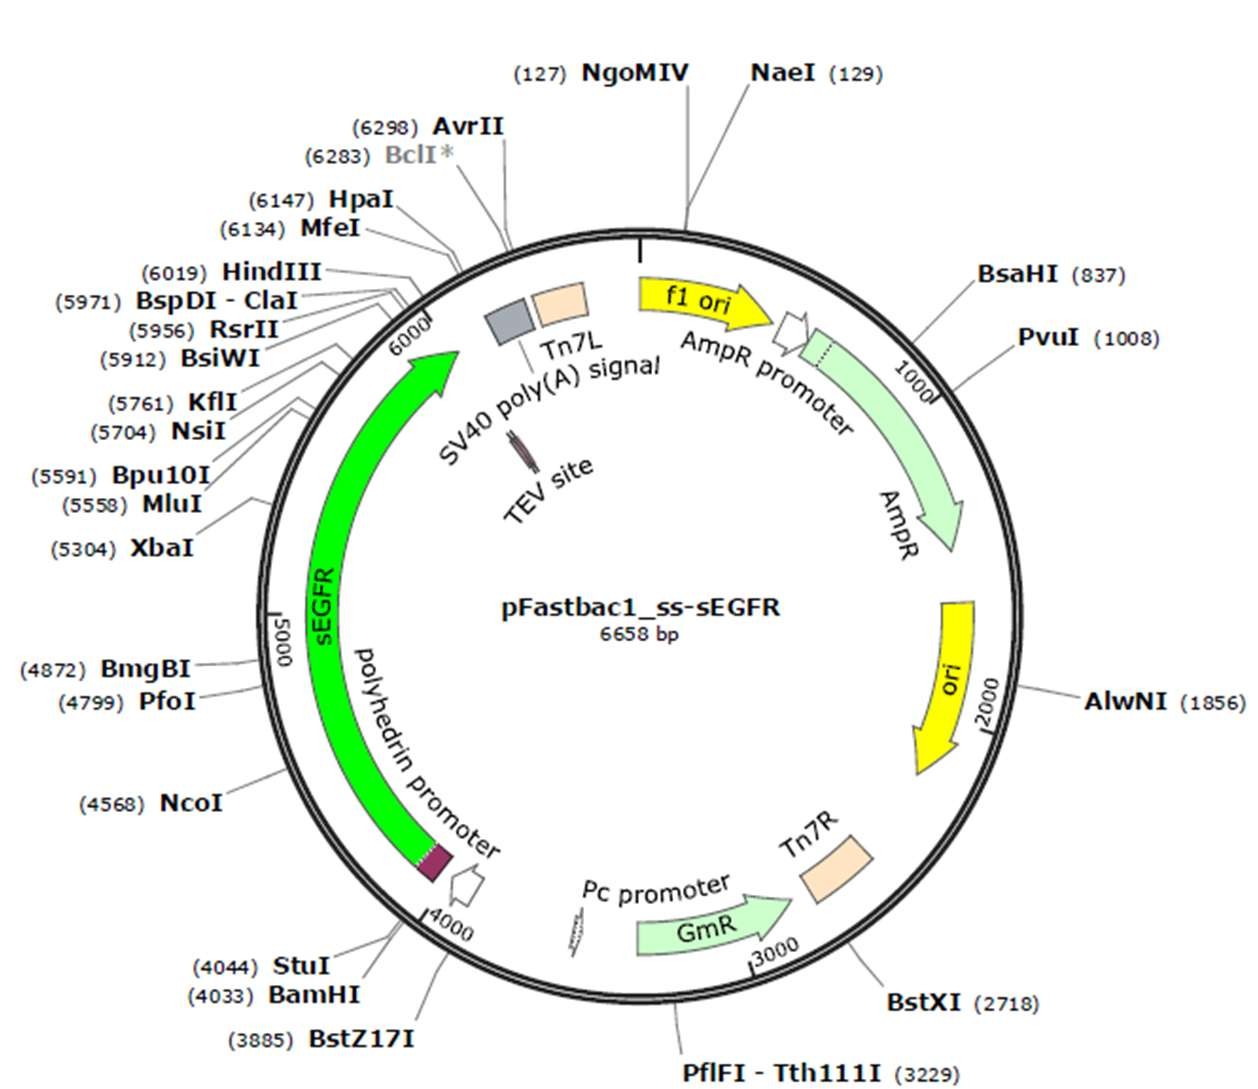


**Supplemental Figure 1.** Schematic representation of Plasmid construct of pFastBac1_ss-sEGFR (6658 bp). The sEGFR insert is cloned under the polyhedrin (polh) promoter for expression in insect cells. The plasmid map was created by using SnapGene software (GSL Biotech LLC)


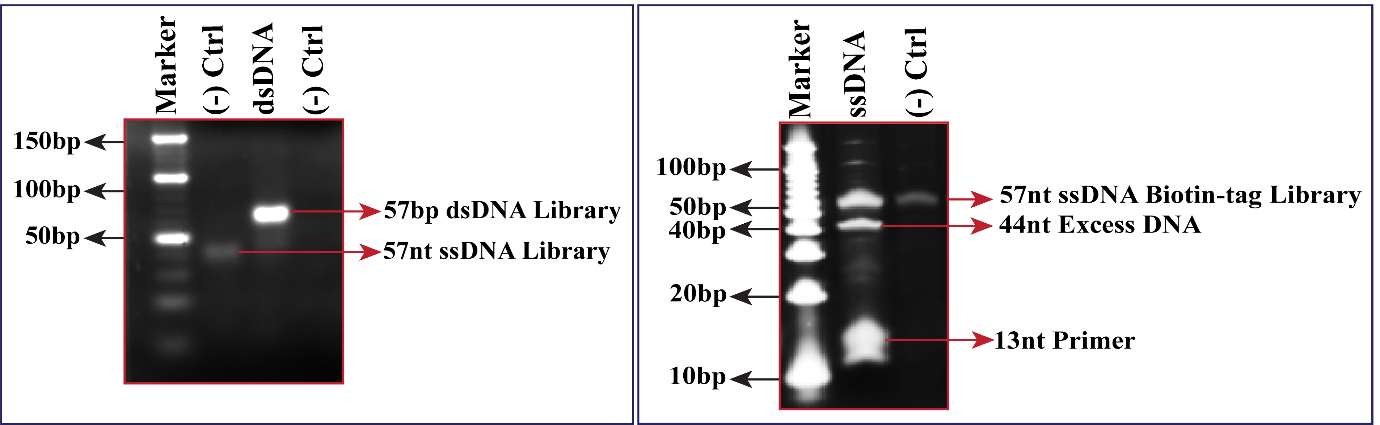


**Supplemental Figure 2**. PCR amplification and ssDNA regeneration of enriched aptamer pools from the 7th cycle of conventional SELEX against sEGFR. Representative 3% agarose gels (left panels) show PCR-amplified doublestranded DNA (dsDNA) aptamer libraries (~57 bp) generated after each SELEX round, alongside single-stranded DNA (ssDNA) products (~57 nt). Corresponding 10% urea–denaturing PAGE gels (right panels) display the separation of ssDNA from the ribo-linkage–containing strand, with distinct bands for the 57 nt ssDNA library and shorter excess DNA fragments (~44 nt), as well as the 13 nt reverse primer. Results are shown sequentially for rounds 1–7 of SELEX, demonstrating successful amplification and efficient ssDNA regeneration at each enrichment stage.


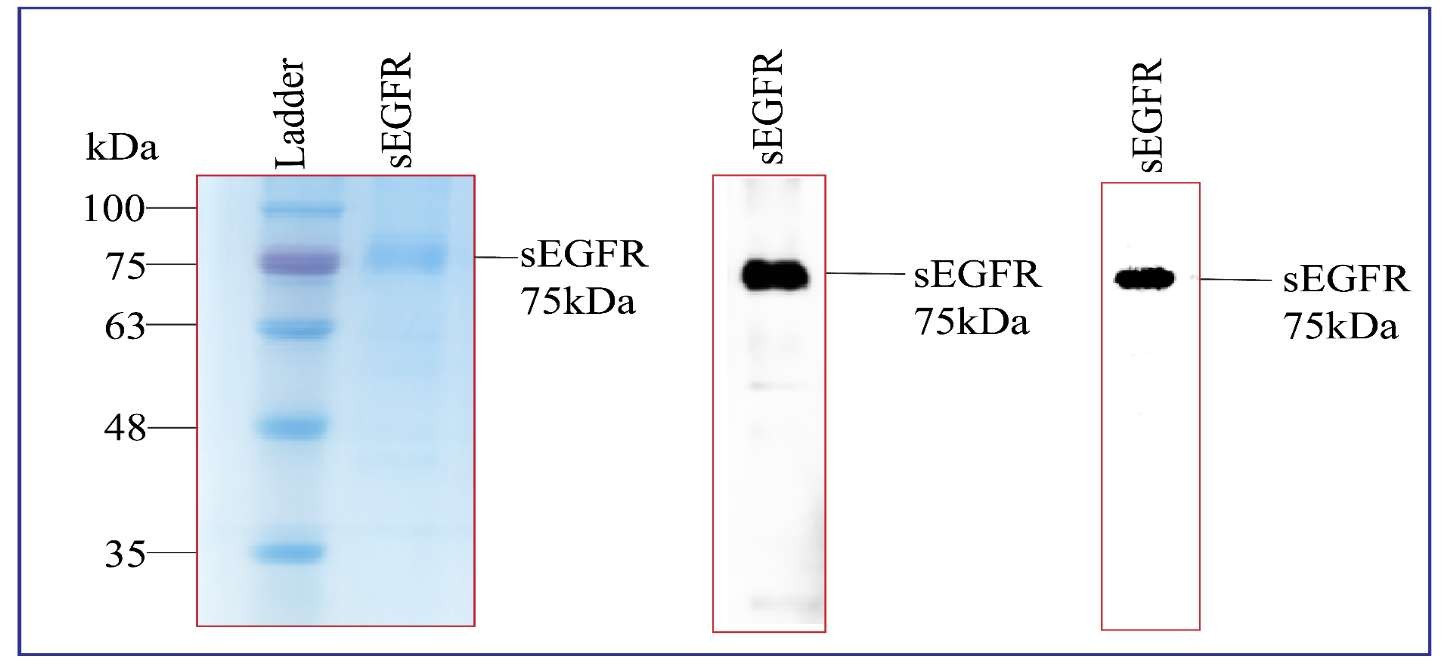


**Supplemental Figure 3**. Purification and analysis of recombinant sEGFR protein. The figure shows (A) a 12% SDS–PAGE gel of gel filtration chromatography (GFC) purified sEGFR protein, (B) western blot detection using an anti-His tag antibody (1:3000 dilution), and (C) western blot detection using an anti-sEGFR antibody (1:3000 dilution).


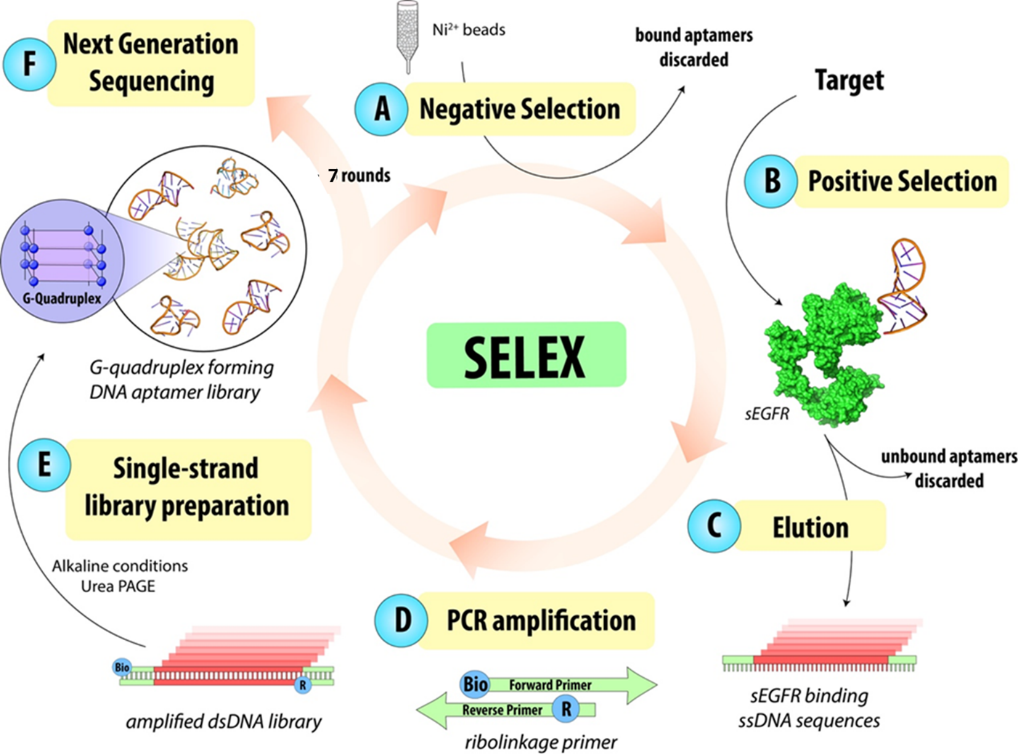


**Supplemental Figure 4**. **Schematic of P-SELEX process to identify sEGFR-specific aptamers.** Step **A** illustrates the negative selection, wherein the ssDNA library is incubated with Ni2+-Sepharose beads to remove Ni-NTA-binding sequences. In step **B**, the unbound library is incubated with sEGFR-bound Ni-NTA beads for positive selection. In Step **C**, the beads are washed and the bound library is eluted, followed by the amplification of the eluted library by PCR in Step **D**. Step **E** illustrates the preparation of the ssDNA library for the iterative-SELEX. In step **F**, the evolved ssDNA pool is subjected to NGS to identify the aptamers that are specific to sEGFR.


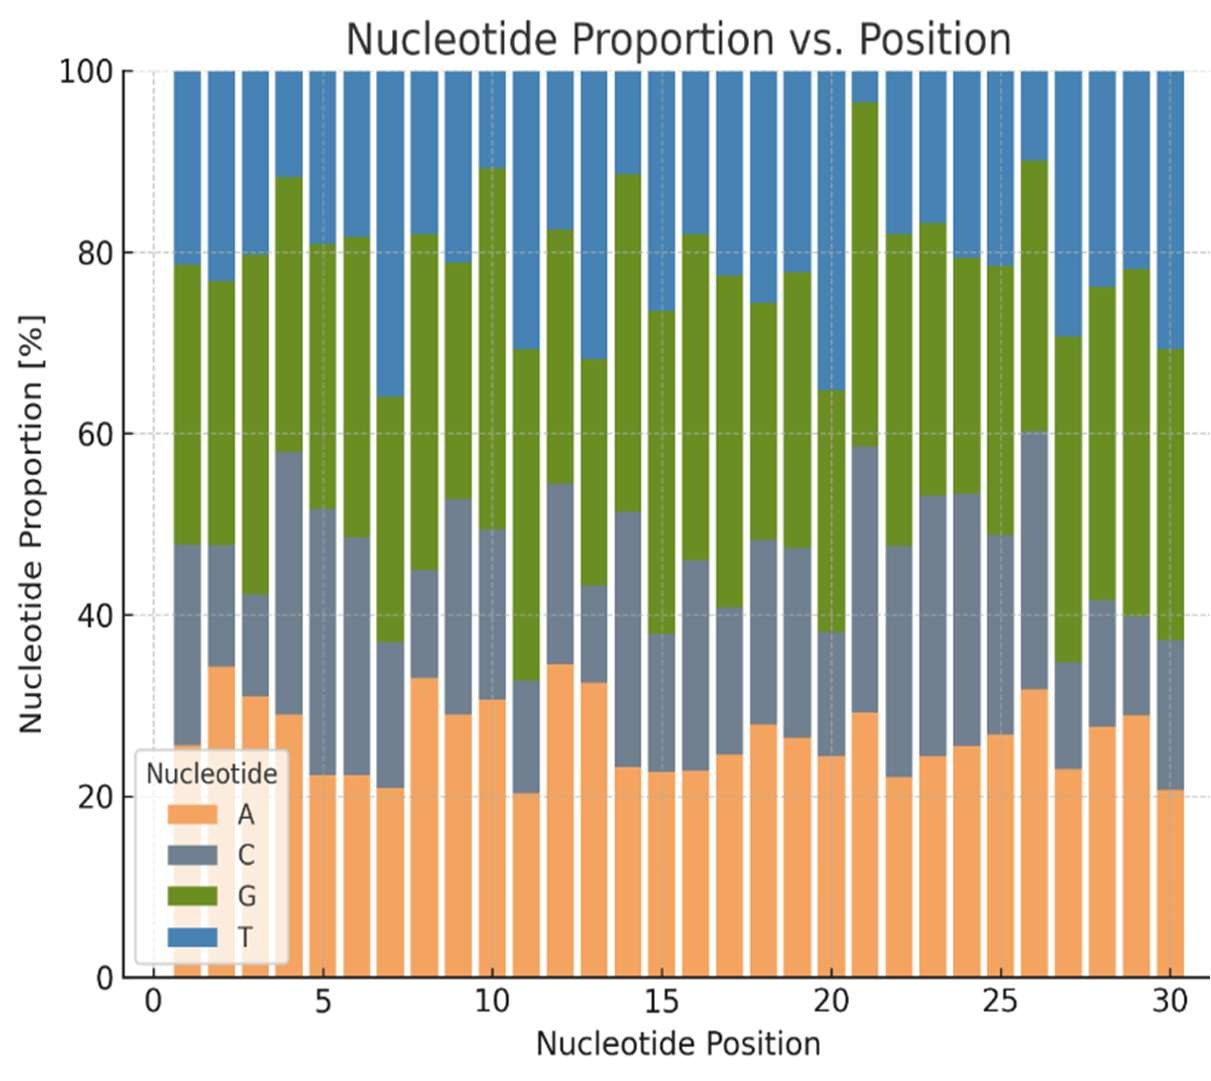


**Supplemental Figure 5.** Nucleotide distribution over the 30 positions of the central random region of the recovered 200 abundant aptamer


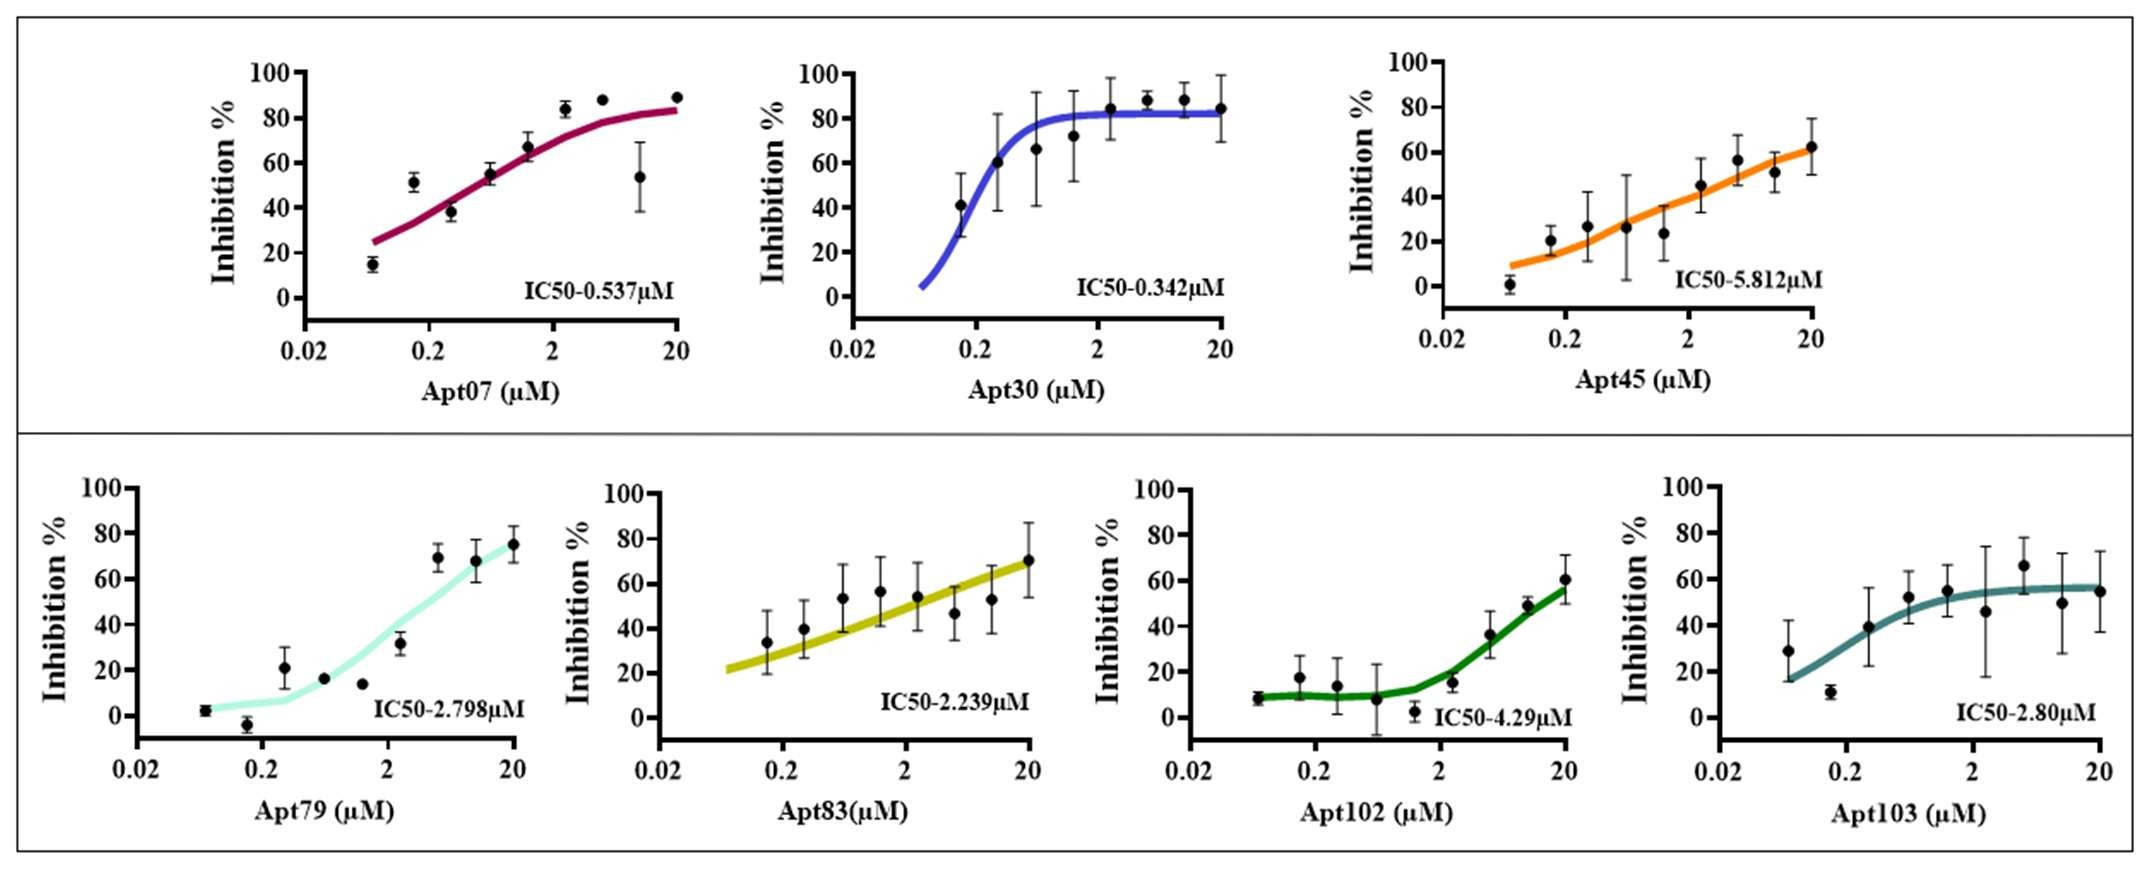
**Supplemental Figure 6.** MTT assay-based cytotoxicity analysis of selected aptamers in A431 cells. Dose– response inhibition curves of ten enriched aptamer candidates (Apt07, Apt30, Apt45, Apt79, Apt83, Apt102, Apt103, and Apt109) in EGFR-overexpressing A431 cells.


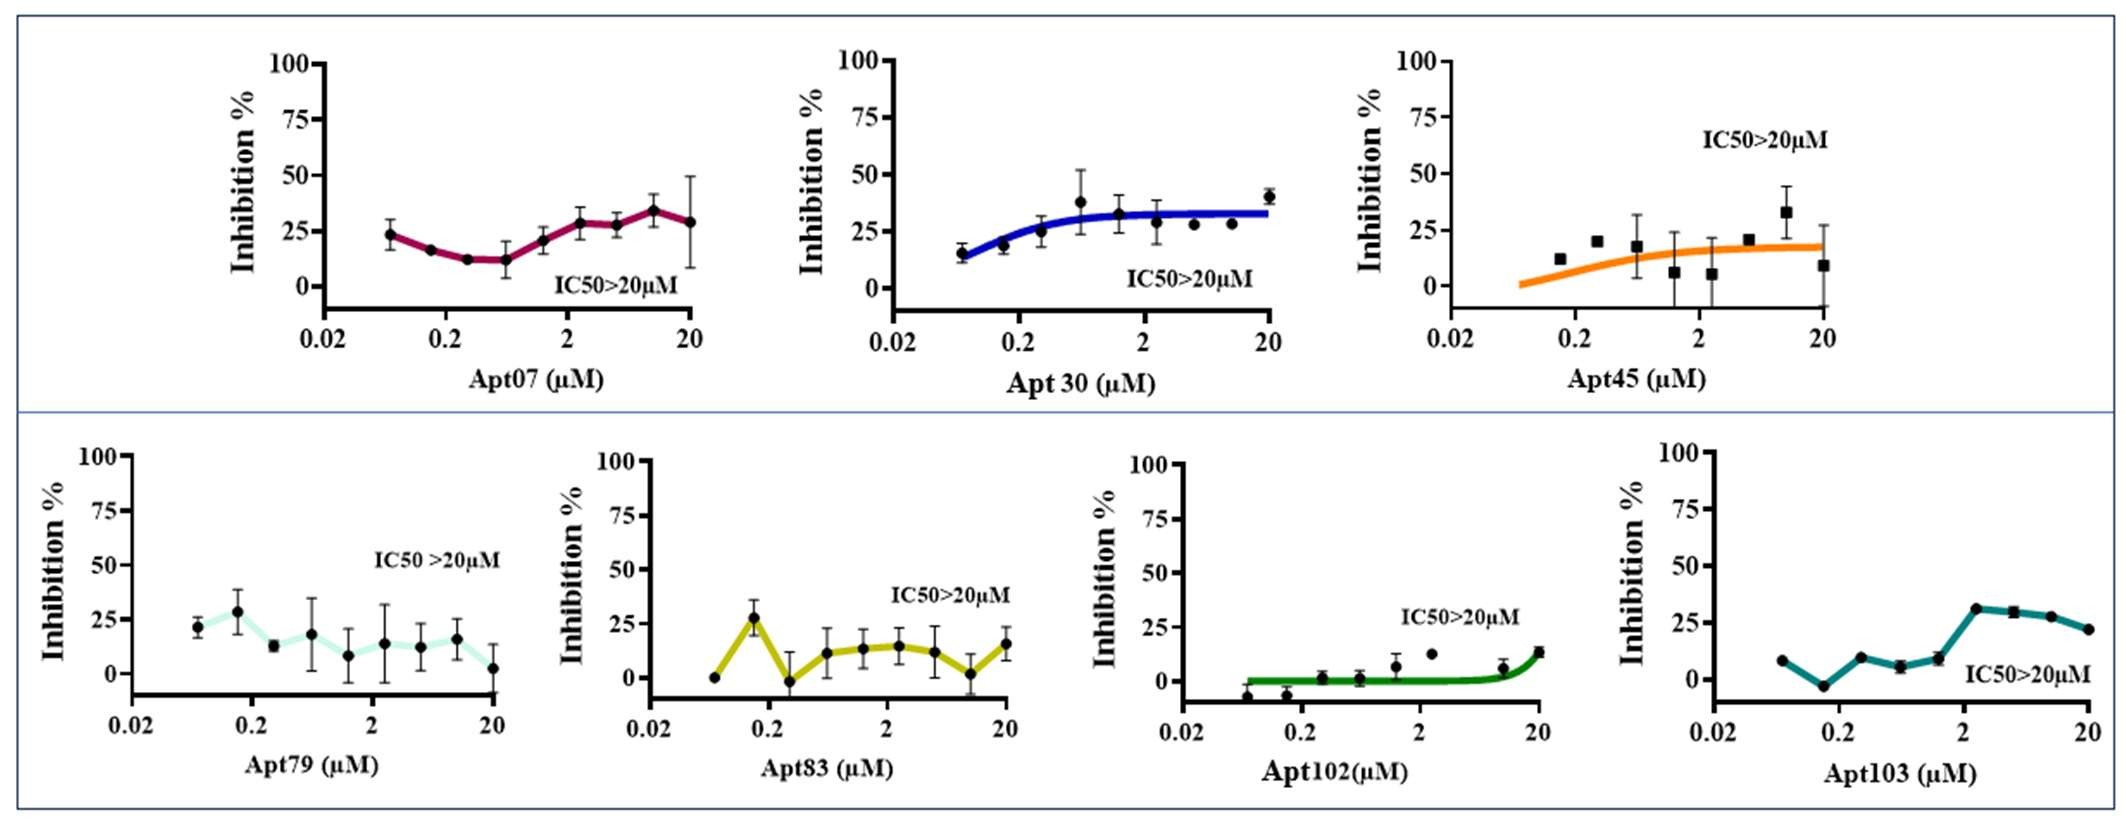


**Supplemental Figure 7**. MTT assay-based cytotoxicity analysis of selected aptamers in A549 cells. Dose– response inhibition curves of ten enriched aptamer candidates (Apt07, Apt30, Apt45, Apt79, Apt83, Apt102, Apt103, and Apt109) in EGFR-moderate expressing A549 cells.


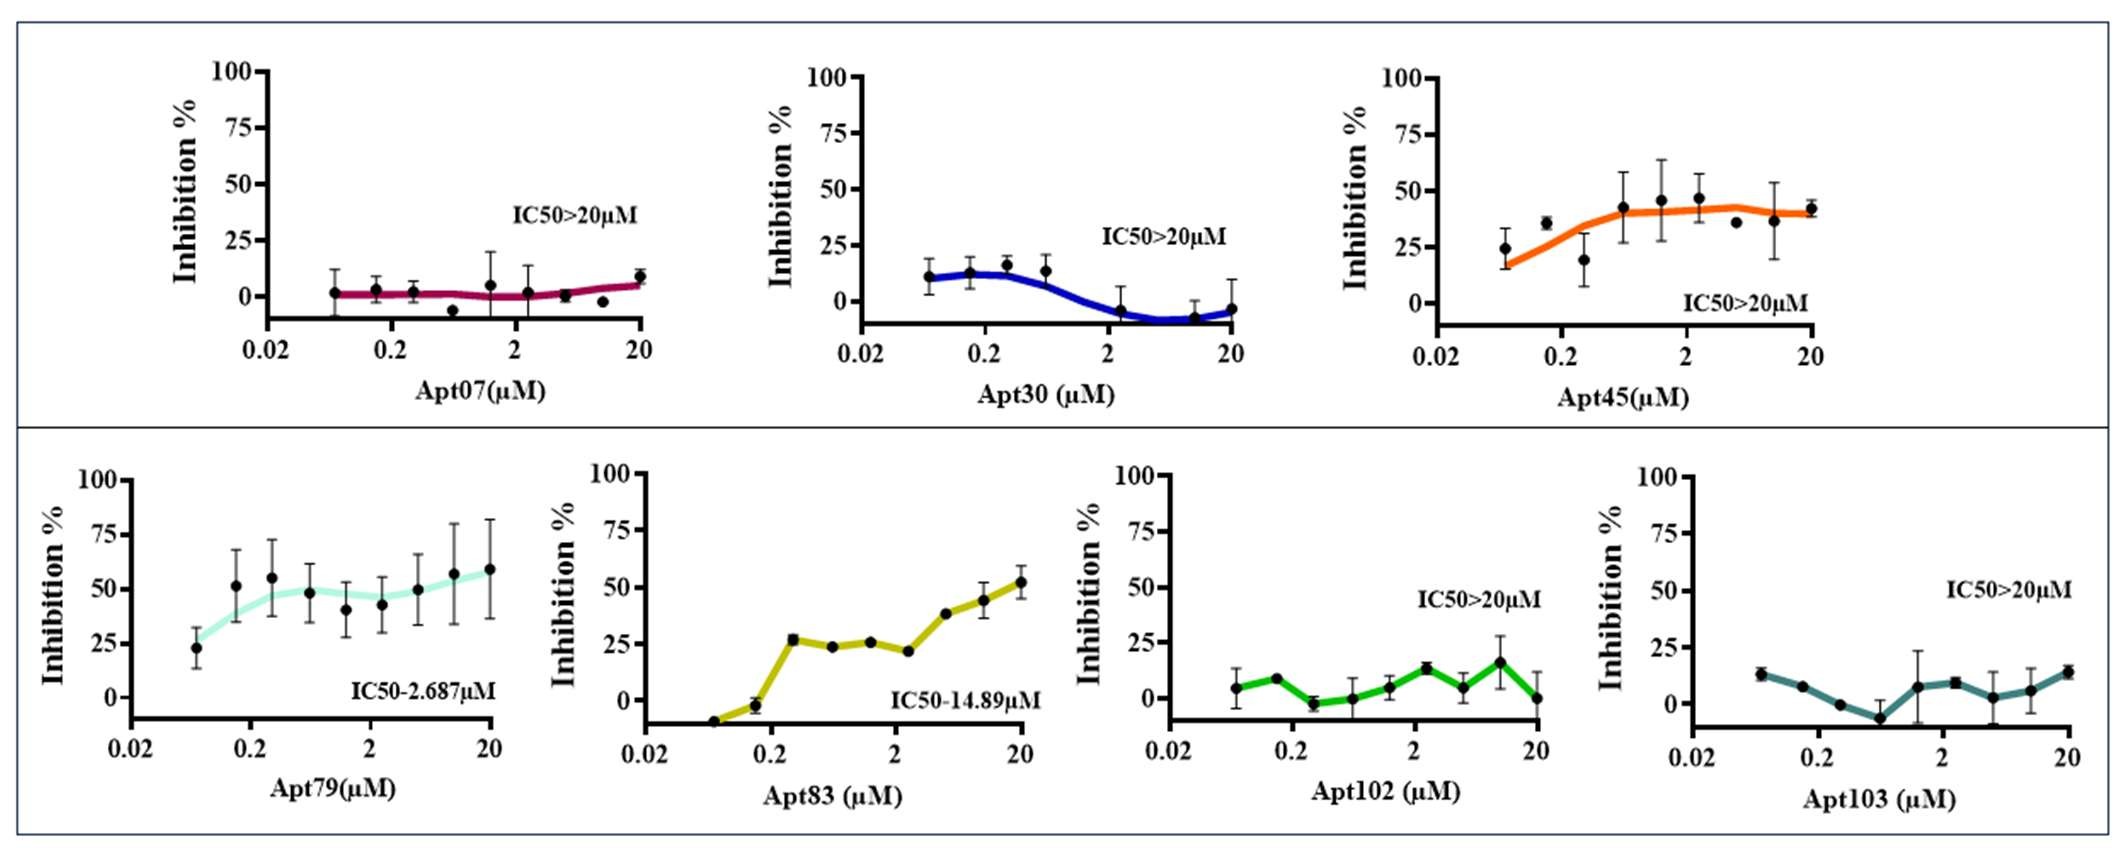


**Supplemental Figure 8.** MTT assay-based cytotoxicity analysis of selected aptamers in Jurkat cells. Doseresponse inhibition curves of ten enriched aptamer candidates (Apt07, Apt30, Apt45, Apt79, Apt83, Apt102, Apt103, and Apt109) in EGFR-negative Jurkat cells.


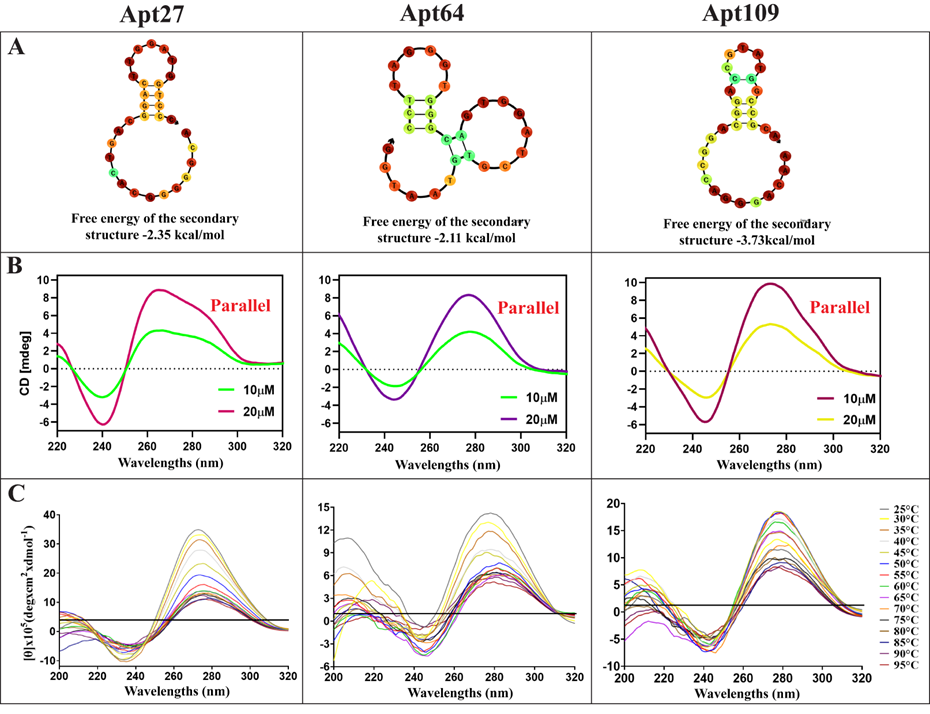


**Supplemental Figure 9. Secondary structure analysis of selected aptamers.** **(A)** The secondary structures of Apt27, Apt64, and Apt109, predicted using the NuPACK web server, showed stable stem-loop arrangements and G-rich sequences capable of forming G4 motifs (top panel). **(B)** CD spectroscopy was performed at two different concentrations (10 µM and 20 µM) (bottom panel). Apt27, Apt64, and Apt109 exhibited parallel G4 topology, with a strong positive peak at ~260 nm and a negative peak at ~240 nm. These CD signatures confirm that all selected aptamers fold into stable G4 structures. **(C)** Thermal stability assessment of Apt27, Apt64, & Apt109 was performed between 25°C and 95°C by CD spectroscopy and the melting curves were generated to evaluate thermal stability of their G4 conformations. Spectra were recorded in the 200-320 nm wavelength range.


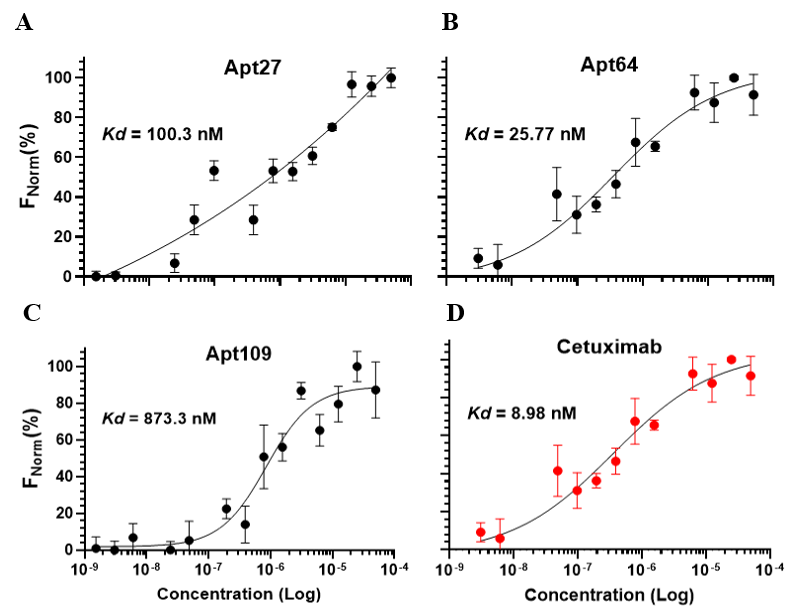


**Supplemental Figure 10. Binding affinities of the selected aptamers by MST.** MST analysis of Apt27, Apt64 and Apt109 against sEGFR suggested that Apt64 exhibited the highest binding affinity for sEGFR (*Kd* = 25.77 nM), which is at par with that of Cetuximab (*Kd* = 8.98 nM). Shown are the binding affinities of **A.** Apt27, **B.** Apt64, **C.** Apt109, **D.** Cetuximab.


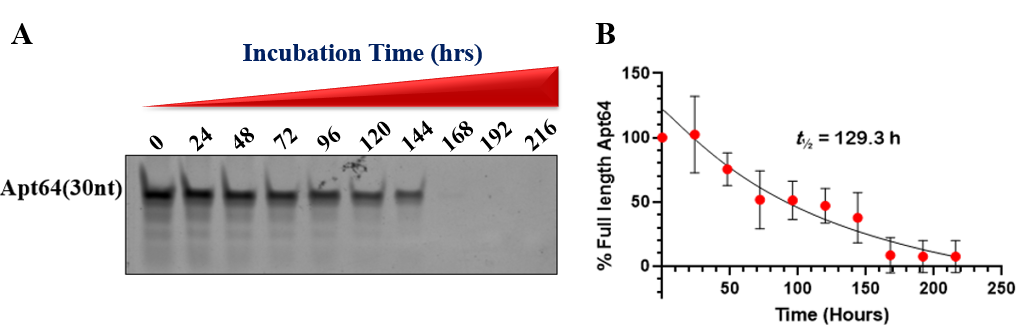


**Supplemental Figure 11. Serum stability of Apt64. (A)** Denaturing PAGE analysis of Apt64 (30-nt) incubated in 50% human AB serum at 37 °C for the indicated time points (0-216 h). The intact band corresponding to Apt64 remained clearly visible at least up to 144 h, but was barely visible starting from 168 h onwards. **(B)** Densitometric quantification of the full length Apt64, averaged from three independent experiments (mean ± SD), showing gradual degradation with a calculated half-life of ~129 h.
